# Supplementary material for: Nutritional, Inflammatory, and CT-Derived Body Composition Changes During Adjuvant Chemotherapy for Stage II/III Colorectal Cancer: A Single-Center Retrospective Cohort
Source: Research Square preprint supplement (doi:10.21203/rs.3.rs-8046965/v1), 2025-12-11
Supplement: Supplementary file 1 [file 34c4b0d545a57bf5c327ac08.xlsx]

## Sheet: table 1
	Characteristics		All patient, n=142
	Age (years old), median (IQR)		67 (61, 73)
	Sex, n (%)
		Male	79 (55.6)
		Female	63 (44.4)
	Stage, n (%)
		II	39 (27.5)
		III	103 (72.5)
	Postoperative adjuvant therapy regimen, n (%)
		S-1 6 month	1 (0.7)
		UFT/LV 6 month	72 (50.7)
		Capecitabine 6 month	28 (19.7)
		CAPOX 3 month	12 (8.5)
		CAPOX 6 month	28 (19.7)
		FOLFOX 3 month	0 (0.0)
		FOLFOX 6 month	1 (0.7)
	Dose reduction of adjuvant chemotherapy, n (%)		31 (21.8)
	Adjuvant chemotherapy discontinuation, n (%)		45 (31.7)
	Reasons for discontinuation, n (%)
		Adverse Event	36 (80.0)
		Cancer Recurrence	5 (11.1)
		Worsening Comorbidity	2 (4.4)
		Patient Decision / Voluntary Withdrawal	2 (4.4)
	S-1: Tegafur / gimeracil / oteracil potassium
	UFT/LV: Tegafur / uracil plus leucovorin
	CAPOX: Capecitabine plus oxaliplatin
	FOLFOX: Leucovorin (folinic acid) plus 5-fluorouracil plus oxaliplatin

## Sheet: table 2
		Overall (N=142)				Doublet therapy (N=41)				Monotherapy (N=101)
	Characteristics	preoperative	post adjuvant-chemotherapy	p-value		preoperative	post adjuvant-chemotherapy	p-value		preoperative	post adjuvant-chemotherapy	p-value
	BMI (kg/m²)	22.5 [20.2-24.6]	22.7 [20.0-24.3]	0.0069		23.2 [20.2-25.4]	22.9 [21.1-25.1]	0.2275		22.3 [20.2-24.3]	22.6 [19.9-24.2]	0.0141
	PMI (cm²/m²)	4.7 [3.6-5.7]	4.6 [3.5-5.6]	0.2594		5.4 [3.7-6.7]	4.6 [3.4-6.4]	0.0079		4.6 [3.6-5.5]	4.6 [3.5-5.4]	0.8487
	PMD (HU)	42.6 [36.2-48.5]	42.0 [36.2-48.0]	0.6734		45.1 [38.4-50.2]	44.7 [36.9-49.4]	0.2232		41.7 [34.3-48.4]	41.6 [35.9-47.8]	0.8126
	mIMAC	134.1 [122.0-145.2]	135.0 [125.8-144.6]	0.4785		143.4 [134.2-151.4]	139.7 [132.1-146.4]	0.0697		131.8 [118.9-142.7]	132.7 [120.0-143.7]	0.8389
	GNRI	103.0 [95.6-108.2]	104.1 [97.8-111.1]	0.0012		104.3 [99.6-111.4]	104.9 [96.1-111.0]	0.856		101.5 [94.7-107.3]	103.8 [98.4-111.6]	<0.001
	PNI	47.6 [44.2-50.5]	49.1 [46.3-53.0]	<0.001		49.2 [45.6-51.4]	48.8 [47.2-52.8]	0.3442		47.2 [43.7-50.0]	49.3 [46.2-53.0]	<0.001
	HALP score	26.1 [17.5-40.4]	38.7 [28.5-52.9]	<0.001		28.7 [19.3-46.7]	41.0 [32.9-57.0]	<0.001		25.5 [17.3-39.7]	36.4 [28.4-49.7]	<0.001
	NLR	2.5 [1.8-3.7]	1.8 [1.3-2.6]	<0.001		2.5 [1.8-3.6]	1.7 [1.4-2.1]	<0.001		2.4 [1.8-3.7]	2.0 [1.3-2.9]	<0.001
	PLR	175.9 [129.3-249.2]	137.3 [107.1-176.0]	<0.001		178.7 [131.9-260.9]	121.3 [99.9-169.7]	<0.001		174.0 [129.3-245.3]	140.8 [109.4-180.6]	<0.001
	†: Wilcoxon signed-rank test
	Doubret therapy=CAPOX or FOLFOX
	Monotherapy=S-1, UFT/LV or capecitabine
	BMI: Body Mass Index
	PMI: Psoas Muscle Index
	PMD: Psoas Muscle Density
	mIMAC: modified Intramuscular Adipose Tissue Content
	GNRI: Geriatric Nutritional Risk Index
	PNI: Prognostic Nutritional Index
	HALP score: Hemoglobin, Albumin, Lymphocyte, Platelet score
	NLR: Neutrophil-Lymphocyte Ratio
	PLR: Platelet-Lymphocyte Ratio

## Sheet: table 3
		Overall (N=142)			Doublet therapy (N=41)			Monotherapy (N=101)
	Characteristics	No discontinuation (N=97)	Discontinuation (N=45)	p-value	No discontinuation (N=29)	Discontinuation (N=12)	p-value	No discontinuation (N=68)	Discontinuation (N=33)	p-value
	Age (years old)	66.0 [63.0-72.0]	70.0 [61.0-75.0]	0.09	64.0 [57.0-67.0]	56.5 [50.5-66.3]	0.329	68.0 [63.8-73.0]	72.0 [69.0-76.0]	0.01823
	Preoperative BMI (kg/m²)	22.6 [19.9-24.3]	22.5 [20.6-25.0]	0.379	23.7 [20.8-25.6]	21.3 [20.1-24.0]	0.33	21.9 [19.9-23.9]	23.0 [20.7-25.5]	0.07667
	Preoperative PMI (cm²/m²)	4.8 [3.7-5.8]	4.6 [3.6-5.6]	0.605	5.7 [4.5-6.7]	4.1 [3.2-5.7]	0.152	4.5 [3.7-5.4]	4.7 [3.6-5.6]	0.5673
	Preoperative PMD (HU)	44.6 [34.3-50.2]	40.5 [36.9-45.4]	0.274	45.1 [38.8-50.2]	43.5 [37.7-49.1]	0.886	43.3 [33.6-49.9]	40.1 [35.8-43.6]	0.2633
	Preoperative mIMAC	132.8 [121.2-145.1]	137.0 [122.4-145.2]	0.625	142.9 [132.1-149.2]	144.3 [136.9-152.5]	0.39	130.9 [118.0-142.7]	133.3 [120.6-141.3]	0.7418
	Preoperative GNRI	103.9 [95.8-108.2]	102.3 [94.7-107.3]	0.579	107.1 [101.1-112.1]	102.4 [95.3-103.7]	0.019	101.5 [94.7-106.6]	101.5 [94.7-109.2]	0.4757
	Preoperative PNI	48.2 [44.8-51.3]	46.8 [43.2-49.7]	0.07	50.3 [47.6-52.3]	46.6 [41.2-48.5]	0.014	47.3 [43.6-50.6]	46.8 [43.7-49.7]	0.6314
	Preoperative HALP score	28.5 [18.8-40.8]	23.7 [14.5-36.1]	0.139	34.5 [23.1-52.1]	18.8 [13.9-27.5]	0.011	25.6 [17.2-38.9]	25.0 [17.5-39.8]	0.9787
	Preoperative NLR	2.4 [1.9-3.7]	2.6 [1.8-3.7]	0.922	2.2 [1.8-3.0]	3.5 [2.6-4.0]	0.045	2.5 [1.9-3.8]	2.3 [1.7-3.6]	0.2951
	Preoperative PLR	165.5 [129.3-241.0]	184.8 [130.7-271.1]	0.399	154.9 [117.6-206.9]	252.8 [179.9-309.2]	0.02	170.9 [131.7-246.3]	177.3 [126.8-230.0]	0.5654
	††: Wilcoxon test
	Doubret therapy=CAPOX or FOLFOX
	Monotherapy=S-1, UFT/LV or capecitabine
	BMI: Body Mass Index
	PMI: Psoas Muscle Index
	PMD: Psoas Muscle Density
	mIMAC: modified Intramuscular Adipose Tissue Content
	GNRI: Geriatric Nutritional Risk Index
	PNI: Prognostic Nutritional Index
	HALP score: Hemoglobin, Albumin, Lymphocyte, Platelet score
	NLR: Neutrophil-Lymphocyte Ratio
	PLR: Platelet-Lymphocyte Ratio
